# Supplementary material for: Resolving complex duplication variants in autism spectrum disorder using long-read genome sequencing
Source: HighWire-hosted journal article supplement (doi:10.1101/gr.279263.124), 2024-10-29
Supplement: Supplemental_Material.pdf [file Supplemental_Material.pdf]

## Supplemental Material

### Contents:

- Supplemental Table 1 – Page 1
- Supplemental Table 2 – Page 2
- Supplemental Figure 1 – Page 3-4
- Supplemental Figure 2 – Page 5
- Supplemental Figure 3 – Page 6
- Supplemental Figure 4 – Page 7
- Supplemental Figure 5 – Page 8

### Supplemental Tables

Supplemental\_Table\_S1.pdf

| Family   | Affected genes                                                                                     | Inheritance | ACMG Classification | Proband phenotype                                                                                                              | Other family members                                                                 |
|----------|----------------------------------------------------------------------------------------------------|-------------|---------------------|--------------------------------------------------------------------------------------------------------------------------------|--------------------------------------------------------------------------------------|
| Family 1 | <i>ELOVL6, ENPEP, PITX2, FAM241A, AP1AR, TIFA, ALPK1, NEUROG2, ZGRF1, LARP7, hsa-miR-297, ANK2</i> | Maternal    | Class 3             | ASD, seizures at age 1, congenital heart disease (VSD, pulmonary stenosis; PDA, muscle bundle heart); generalized joint laxity | One 1 <sup>st</sup> cousin with ASD, two 1 <sup>st</sup> cousins with language delay |
| Family 2 | <i>ELOVL6, ENPEP, PITX2, FAM241A, AP1AR, TIFA, ALPK1, NEUROG2, ZGRF1, LARP7, hsa-miR-297, ANK2</i> | Maternal    | Class 3             | ASD, long palpebral fissures, small feet                                                                                       | Mother: Stargardts disease<br>Sister: Speech and language impairment                 |
| Family 3 | <i>IL1RAPL1, DMD</i>                                                                               | Maternal    | Class 3             | ASD, IQ 83 (Wechsler)                                                                                                          | Brother: ASD, IQ 76 (Leiter)                                                         |
| Family 4 | <i>RNASE13, SUPT16H, CHD8</i>                                                                      | Paternal    | Class 3             | ASD, IQ 122 (Wechsler)<br>ADHD features +VE on SWAN                                                                            | N/A                                                                                  |
| Family 5 | <i>DNASE1, TRAP1, CREBBP</i>                                                                       | Paternal    | Class 3             | ASD, IQ 117 (Wechsler)                                                                                                         | N/A                                                                                  |

Supplemental Table S1. Clinical information about the proband and their families. Candidate ASD genes in each region are in bold. ACMG – American College of Medical Genetics.

## Supplemental\_Table\_S2.pdf

| Family                   | Relation           | Gender | Sequence Data File Name | SampleID (MSSNG ID) |
|--------------------------|--------------------|--------|-------------------------|---------------------|
| Family 1                 | Mother             | Female | op_021_001              | 3-0465-100          |
| Family 1                 | Father             | Male   | op_021_006              | 3-0465-101          |
| Family 1                 | Proband            | Male   | op_021_005              | 3-0465-000          |
| Family 1_additional data | Proband            | Male   | op_035_001              | 3-0465-000          |
| Family 2                 | Mother             | Female | op_021_010              | 3-0772-100          |
| Family 2                 | Father             | Male   | op_021_008              | 3-0772-101          |
| Family 2                 | Proband            | Female | op_021_009              | 3-0772-001          |
| Family 3                 | Mother             | Female | op_021_017              | 2-0264-001          |
| Family 3                 | Father             | Male   | op_021_018              | 2-0264-002          |
| Family 3                 | Proband            | Male   | op_021_019              | 2-0264-003          |
| Family 3                 | Affected sibling   | Male   | op_021_011              | 2-0264-004          |
| Family 3_additional data | Affected sibling   | Male   | op_035_002              | 2-0264-004          |
| Family 3                 | Unaffected sibling | Female | op_021_012              | 2-0264-008          |
| Family 3                 | Unaffected sibling | Female | op_021_020              | 2-0264-007          |
| Family 3                 | Unaffected sibling | Female | op_021_021              | 2-0264-006          |
| Family 4                 | Mother             | Female | op_021_016              | 2-1375-001          |
| Family 4                 | Father             | Male   | op_021_015              | 2-1375-002          |
| Family 4                 | Proband            | Male   | op_021_014              | 2-1375-003          |
| Family 4                 | Unaffected sibling | Male   | op_021_007              | 2-1375-004          |
| Family 5                 | Mother             | Female | op_021_003              | 5-0138-001          |
| Family 5                 | Father             | Male   | op_021_002              | 5-0138-002          |
| Family 5                 | Proband            | Male   | op_021_004              | 5-0138-003          |

**Supplemental Table S2.** Table linking each sample to a unique sample ID and to the source datafile submitted to EGA.

## Supplemental Figures

### Supplemental\_Figure\_S1.pdf

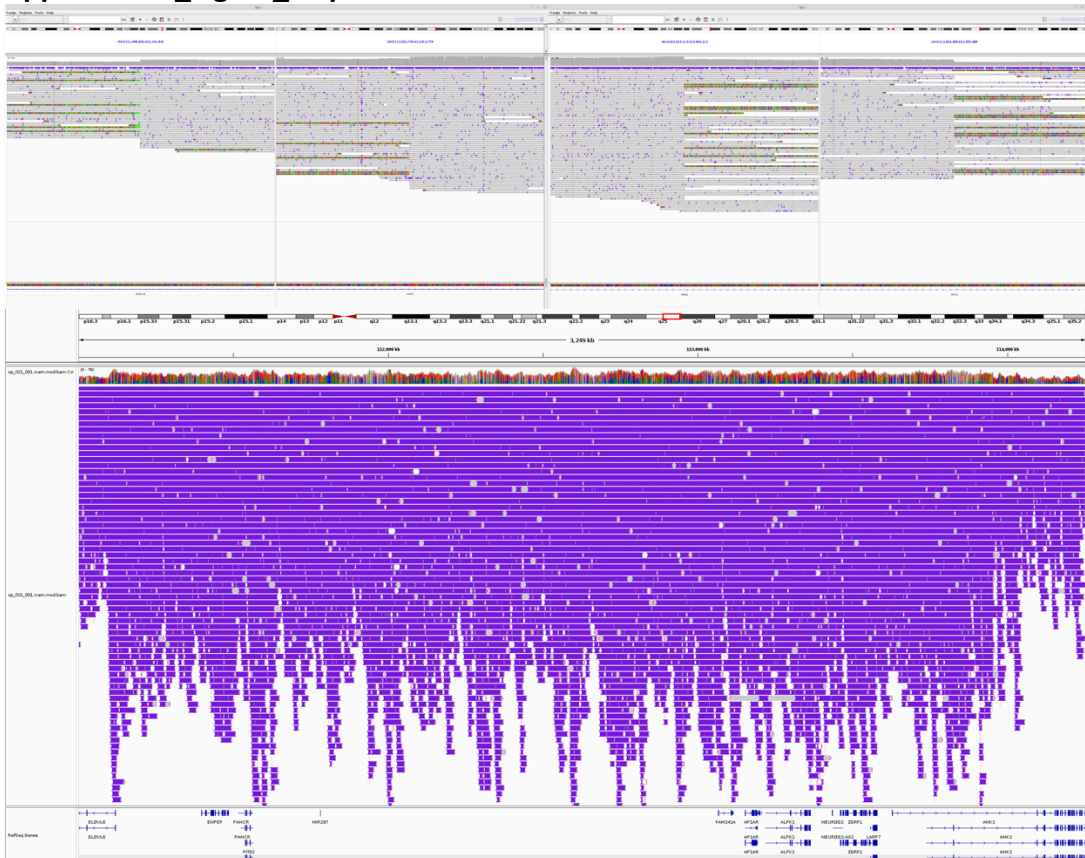

A. ANK2 rearrangement. Family 1 and 2

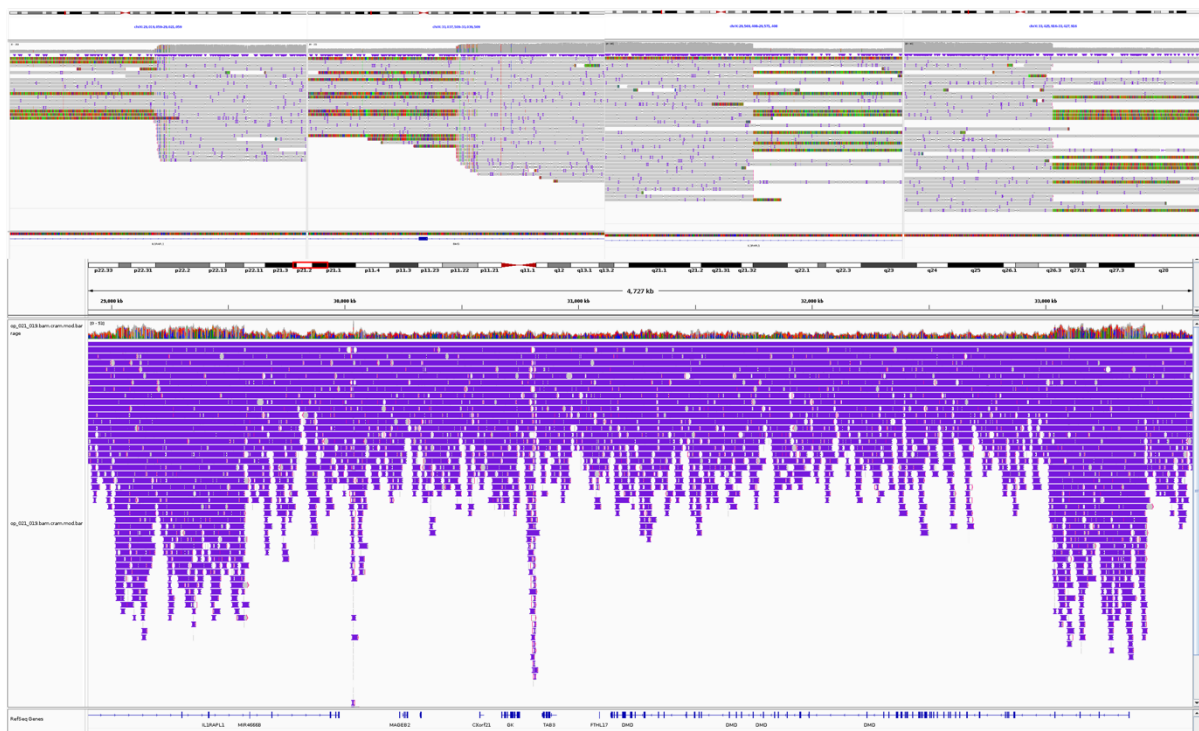

B. DMD rearrangement. Family 3

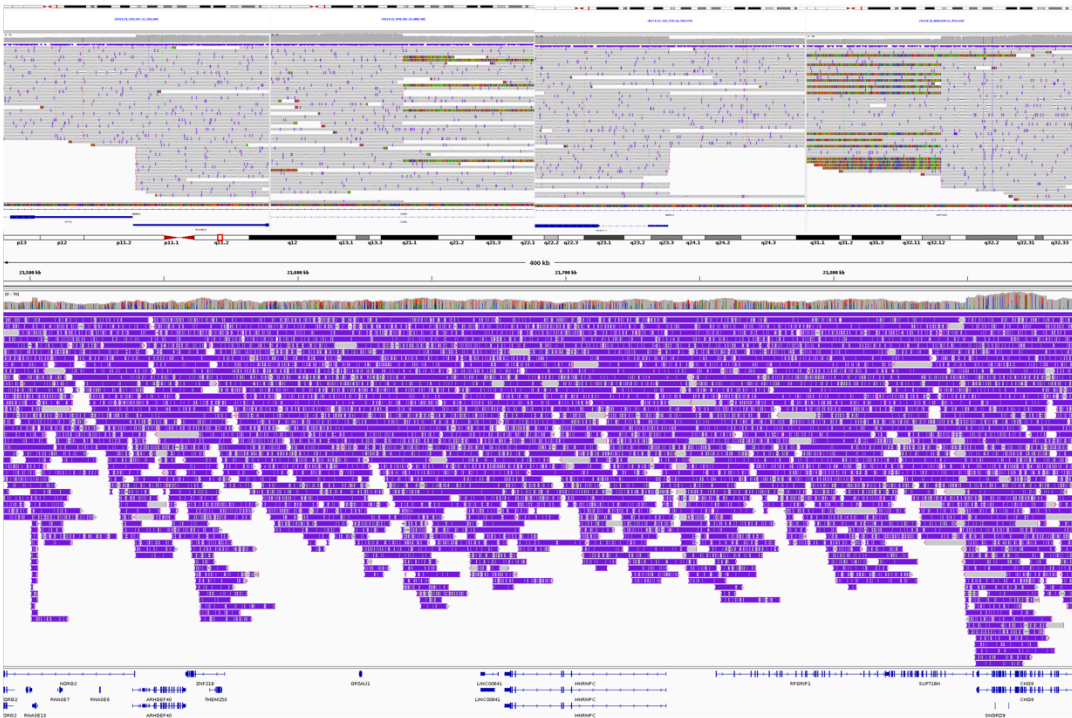

C. *CHD8* rearrangement. Family 4

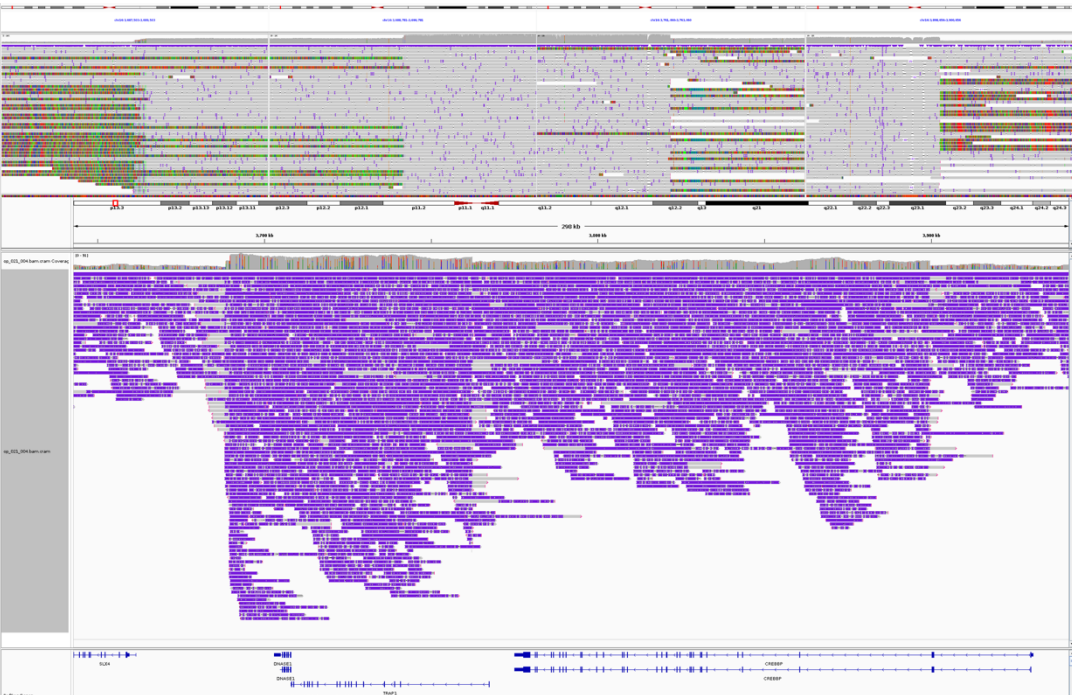

D. *CREBBP* rearrangement. Family 5

**Supplemental Figure S1.** IGV display of each CGR, showing breakpoint reads and coverage plots for each region. **A.** *ANK2*-region in family 1 and 2, **B.** *DMD*-region in family 3, **C.** *CHD8*-region in family 4 and **D.** *CREBBP*-region in family 5.



Supplemental\_Figure\_S3.pdf

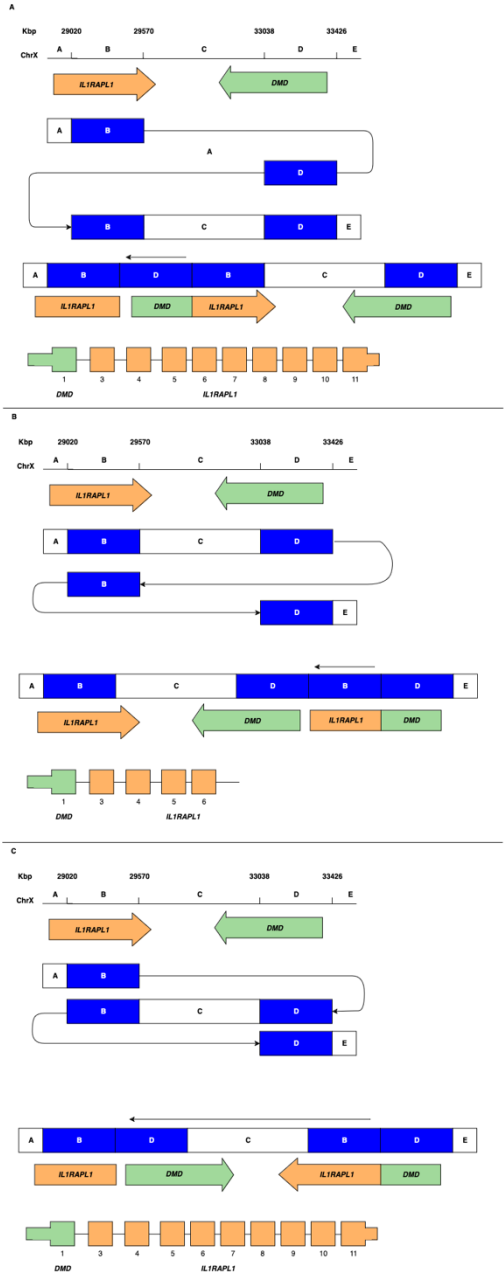

**Supplemental Figure S3.** The rearrangement across *IL1RAPL1* and *DMD* has three theoretical solutions based on the breakpoint and coverage information from the IrGS data. The architecture shown in A and C would both give rise to an in-frame *DMD-IL1RAPL1* fusion transcript. The architecture shown in (B) would also merge *DMD* and *IL1RAPL1*, but would not contain a complete 3'-end of either transcript.

Supplemental\_Figure\_S4.pdf

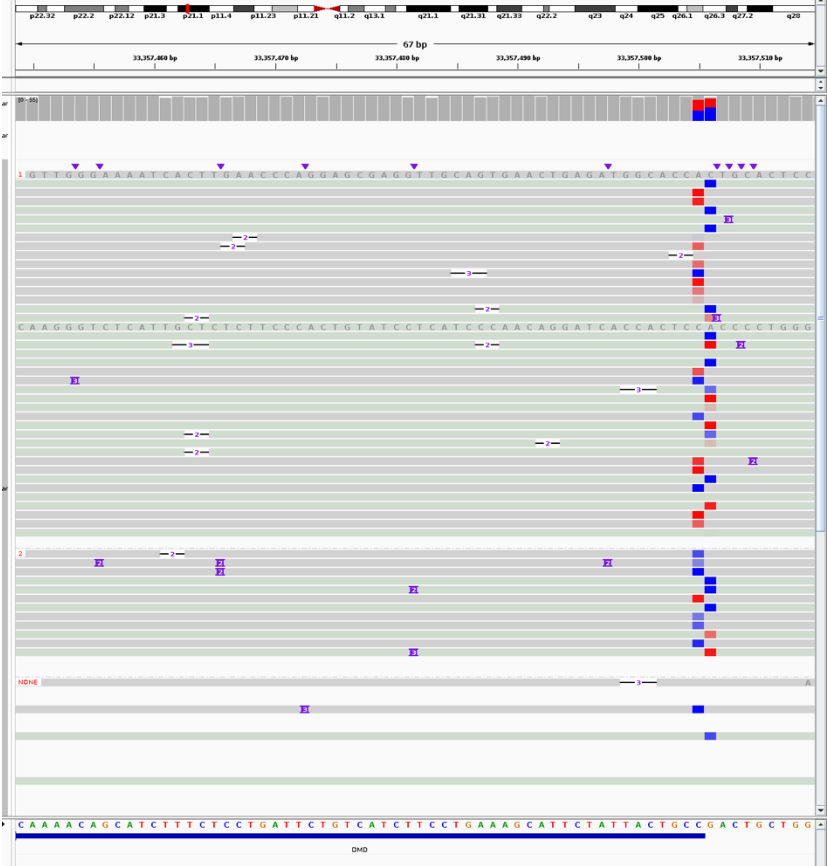

**Supplemental Figure S4.** Methylation site in the DMD promoter in an unaffected carrier female, with methylation status indicated in the maternal and paternal haplotypes, respectively.

Supplemental Figure S5.pdf

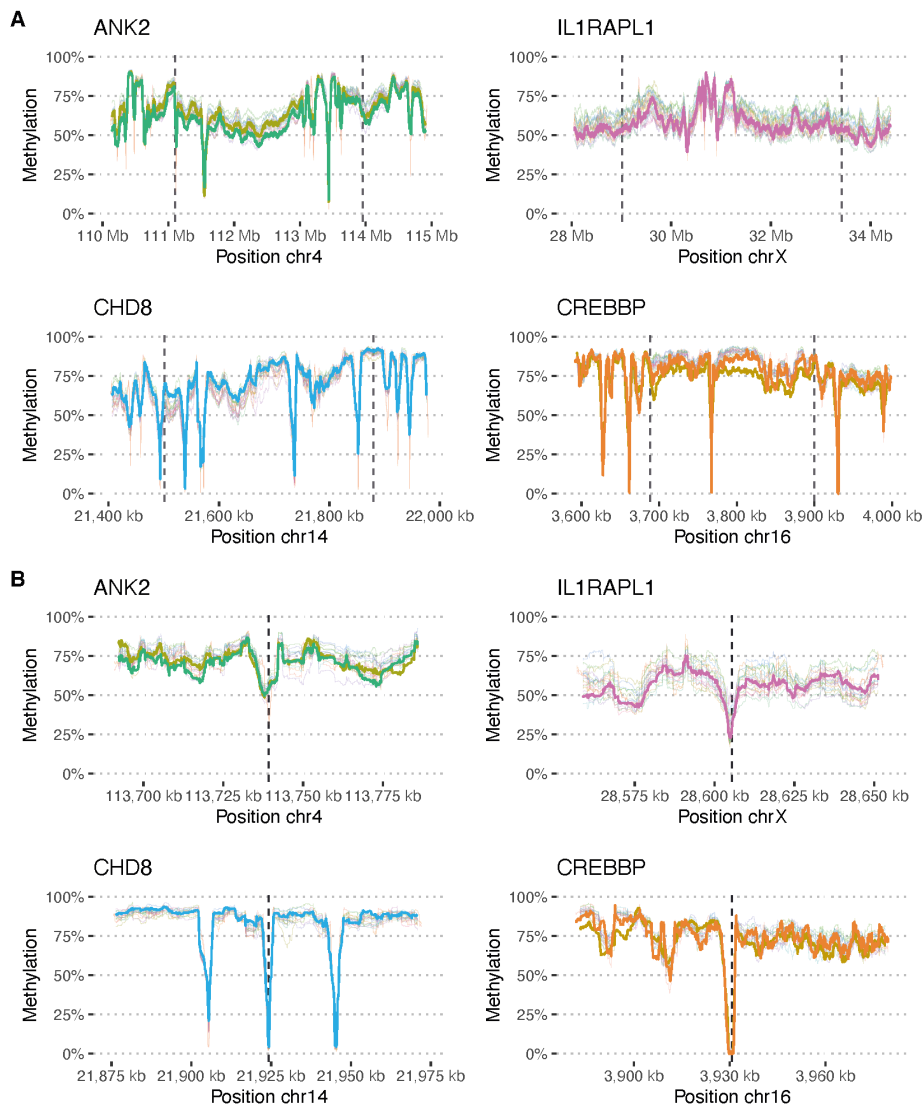

**Supplemental Figure S5.** Methylation calls for CpGs across all sequenced samples. Proband in each family highlighted by thicker lines, and the father is also highlighted in *CREBBP* to match main Figure 5. Shown in (A) is methylation across all CGR regions (A) with the boundaries of the CGR are indicated by dashed lines. In (B), the methylation is shown across the promoter region of each of the candidate ASD genes, with the transcription start site indicated by a dashed line +/- 50kb. Methylation signal in (A) is shown as mean number of methylated calls in rolling windows of 500 CpG sites for *ANK2* and *IL1RAPL1*, and for 50 CpG sites for *CHD8* and *CREBBP*. In (B) all methylation signals are shown in rolling windows of 50 CpG sites.
